# Supplementary material for: Racial Differences in Functional and Sleep Outcomes with Positive Airway Pressure Treatment
Source: MDPI journal article supplement (doi:10.3390/diagnostics11122176), 2021-11-23
Supplement: s1 [file s1]

**Table S1.** Comparison of changes in outcome variables after 3-4 months of PAP treatment (Unadjusted).

|                                           | Follow up |             |    |             | Within Group Changes |                       |    |                       | Standardized Mean Difference |              |
|-------------------------------------------|-----------|-------------|----|-------------|----------------------|-----------------------|----|-----------------------|------------------------------|--------------|
|                                           | N         | AA          | N  | EA          | N                    | AA                    | N  | EA                    | AA vs. EA                    | P-value      |
| <b>Subjective outcomes</b>                |           |             |    |             |                      |                       |    |                       |                              |              |
| Epworth Sleepiness Scale                  | 102       | 9.3 ± 4.0   | 68 | 7.0 ± 4.5   | 100                  | -2.38 (-3.38, -1.38)  | 68 | -4.21 (-5.42, -2.99)  | <b>0.36 (0.05, 0.66)</b>     | <b>0.023</b> |
| Functional Outcome Sleep Questionnaire-10 | 102       | 16.2 ± 3.6  | 67 | 17.2 ± 2.9  | 101                  | 1.21 (0.52, 1.89)     | 66 | 1.77 (0.92, 2.62)     | -0.16 (-0.47, 0.15)          | 0.313        |
| General productivity                      | 101       | 3.22 ± 0.86 | 65 | 3.39 ± 0.70 | 100                  | 0.28 (0.12, 0.43)     | 65 | 0.38 (0.18, 0.57)     | -0.13 (-0.44, 0.19)          | 0.425        |
| Vigilance                                 | 101       | 3.26 ± 0.77 | 65 | 3.37 ± 0.62 | 101                  | 0.26 (0.12, 0.41)     | 65 | 0.22 (0.04, 0.40)     | 0.06 (-0.25, 0.38)           | 0.670        |
| Social outcomes                           | 100       | 3.33 ± 0.83 | 63 | 3.40 ± 0.85 | 100                  | 0.31 (0.13, 0.49)     | 63 | 0.17 (-0.05, 0.40)    | 0.15 (-0.17, 0.47)           | 0.347        |
| Activity level                            | 101       | 3.34 ± 0.90 | 65 | 3.34 ± 0.84 | 101                  | 0.04 (-0.13, 0.22)    | 65 | 0.22 (0.00, 0.44)     | -0.20 (-0.51, 0.11)          | 0.210        |
| Sexual relationships                      | 98        | 3.07 ± 1.14 | 62 | 3.19 ± 1.19 | 98                   | 0.27 (0.05, 0.48)     | 60 | 0.45 (0.18, 0.72)     | -0.17 (-0.50, 0.15)          | 0.293        |
| <b>Actigraphy</b>                         |           |             |    |             |                      |                       |    |                       |                              |              |
| Total sleep time, hours                   | 84        | 6.15 ± 1.65 | 51 | 6.66 ± 1.61 | 79                   | 0.30 (-0.10, 0.70)    | 46 | 0.09 (-0.44, 0.62)    | 0.12 (-0.25, 0.48)           | 0.535        |
| Wake after sleep onset, min               | 84        | 63.7 ± 41.2 | 51 | 64.1 ± 42.1 | 80                   | -11.42 (-23.99, 1.15) | 46 | -3.06 (-19.63, 13.52) | -0.15 (-0.51, 0.22)          | 0.427        |
| Frequency of awakening, per hour          | 84        | 34.9 ± 15.8 | 51 | 29.3 ± 14.2 | 79                   | -1.18 (-5.05, 2.69)   | 46 | -8.27 (-13.33, -3.20) | 0.40 (-0.04, 0.76)           | <b>0.030</b> |
| <b>Psychomotor Vigilance Tests</b>        |           |             |    |             |                      |                       |    |                       |                              |              |
| Number of lapses                          | 85        | 5.33 ± 7.80 | 57 | 4.67 ± 6.70 | 75                   | 0.41 (-1.90, 2.73)    | 56 | -0.30 (-2.98, 2.37)   | 0.07 (-0.28, 0.42)           | 0.689        |
| Median reaction time, msec                | 85        | 270 ± 56    | 56 | 267 ± 51    | 75                   | 1.26 (-11.30, 13.82)  | 55 | -5.90 (-20.56, 8.77)  | 0.13 (-0.22, 0.48)           | 0.465        |
| Mean slowest reaction time, msec          | 85        | 3.23 ± 0.97 | 56 | 3.05 ± 0.83 | 74                   | 0.91 (0.71, 1.11)     | 55 | 0.69 (0.46, 0.92)     | 0.25 (-0.10, 0.60)           | 0.166        |
| Mean fastest reaction time, msec          | 60        | 274 ± 65    | 51 | 252 ± 65    | 57                   | 69.12 (54.27, 83.96)  | 51 | 46.96 (31.26, 62.65)  | 0.39 (0.01, 0.76)            | 0.044        |

AA African American, EA European American

Within group change in outcomes are presented as mean (95% confidence interval)

Standardized Mean Difference (SMD) is the standardized difference in outcomes change in African American vs. European American. Data are presented as difference in mean change (95% confidence interval). SMD can be interpreted as small (0.2), moderate (0.5) or large (0.8).
